# Supplementary figures and images for: Celastrol and Triptolide Suppress Stemness in Triple Negative Breast Cancer: Notch as a Therapeutic Target for Stem Cells
Source: MDPI journal article supplement (doi:10.3390/biomedicines9050482), 2021-04-28

**A**

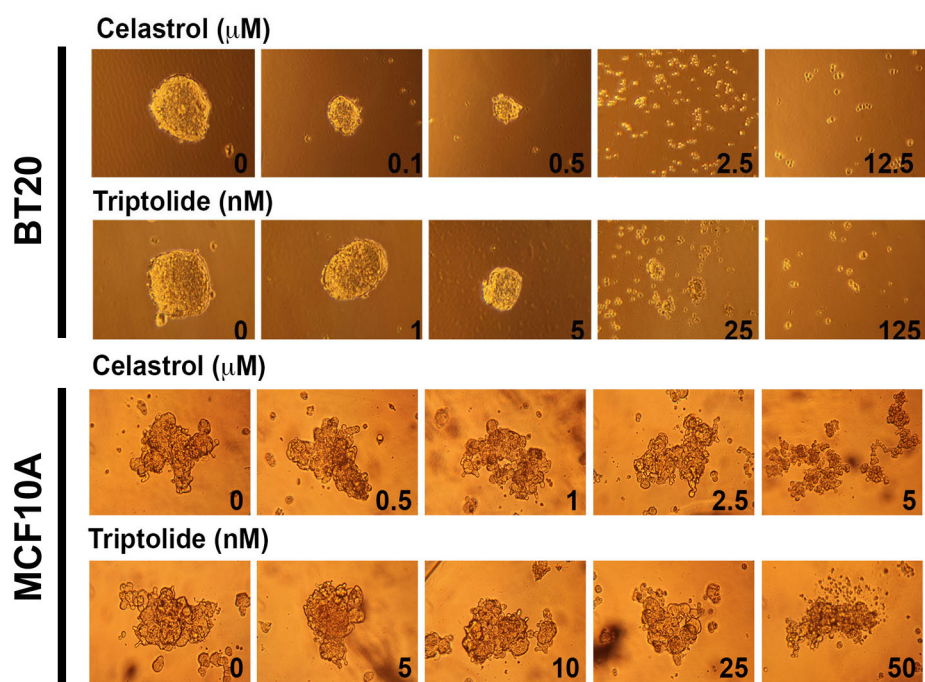

**B**

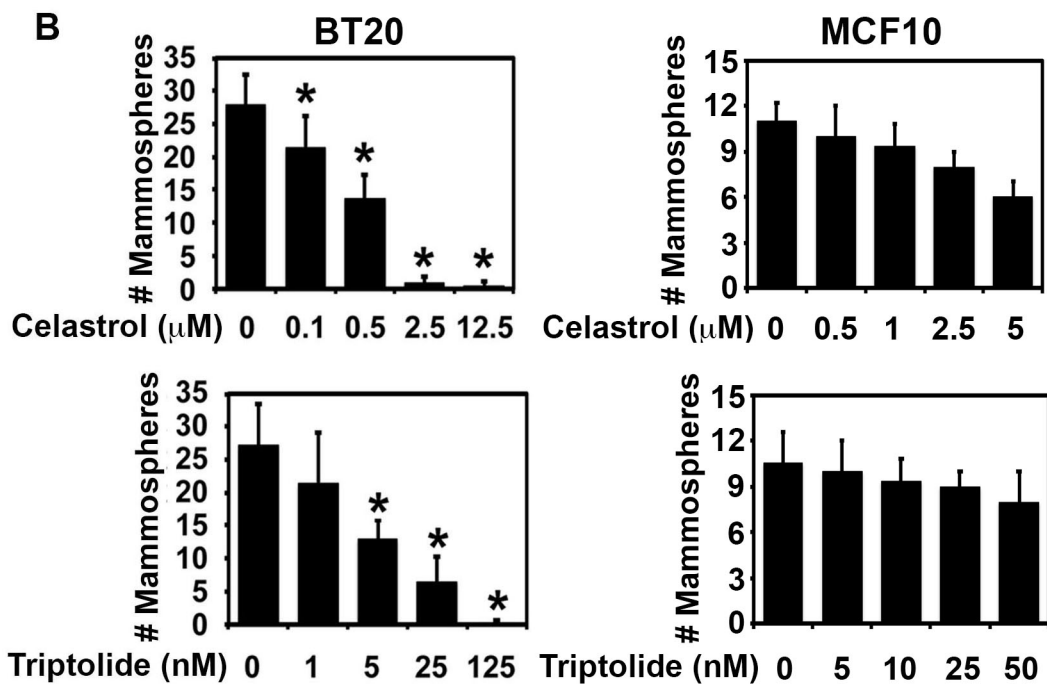

**C**

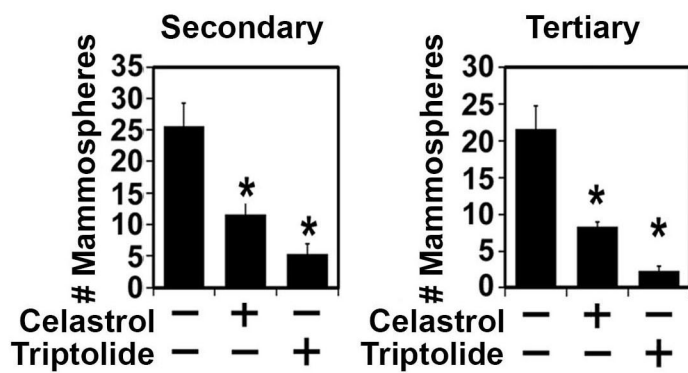

## 2D culture

|            |   |   |   |
|------------|---|---|---|
| Celastrol  | — | + | — |
| Triptolide | — | — | + |

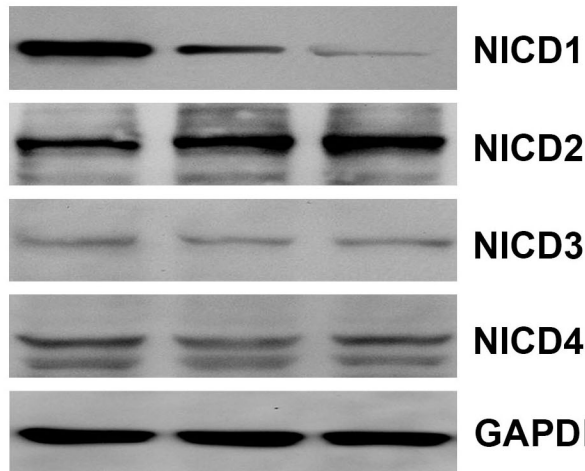

## Mammosphere

|            |   |   |   |
|------------|---|---|---|
| Celastrol  | — | + | — |
| Triptolide | — | — | + |

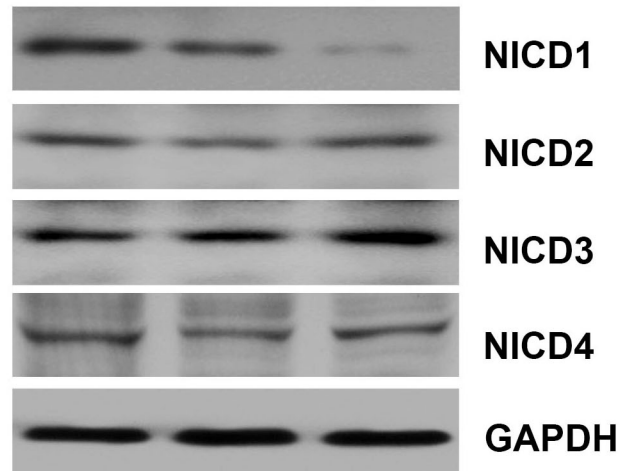

Supplement: s1 [file s1]
